# Supplementary material for: Dephasing Processes in the Molecular Dye Lumogen-F Orange Characterized by Two-Dimensional Electronic Spectroscopy
Source: MDPI journal article supplement (doi:10.3390/molecules27207095), 2022-10-20
Supplement: s1 [file s1]

## 1. Static absorption and photoluminescence spectra of LFO films in polystyrene and polynorbornene

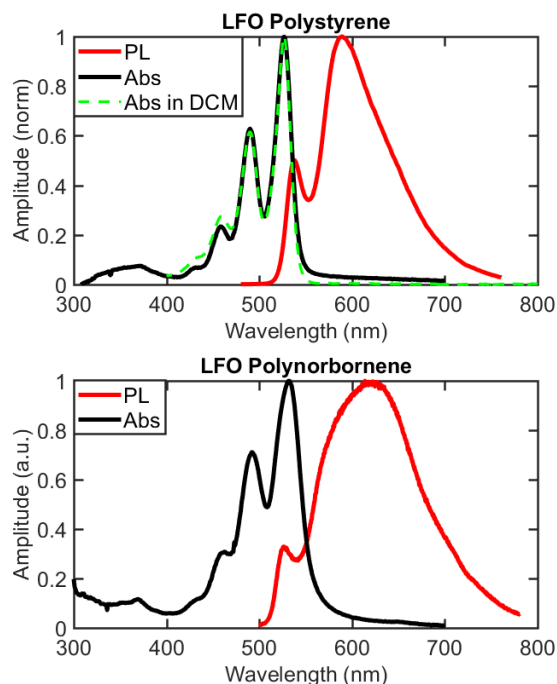

**Figure S1.** Static absorption (black lines) and photoluminescence (red lines) spectra of LFO films (10% concentration) in polystyrene (top) and polynorbornene (bottom). The green dashed line on the top panel represents the static absorption spectrum of the LFO diluted in DCM.

UV-vis absorption measurements were recorded using a Horiba Fluoromax 4 fluorometer equipped with a xenon lamp. For photoluminescence measurements, a 405 nm CW Thorlabs laser diode was focused onto the sample. The emitted PL was collimated and focused by a series of lenses into an optical fiber coupled to an Andor Shamrock SR-303i-A triple-grating CCD spectrometer. There was no correction done for the wavelength sensitivity. The only correction done was to measure the absorption by also measuring the absorption of a glass substrate. This was then divided by the sample spectrum. The PL spectra was not corrected in the transition dipole moment representation.

## 2. Transient absorption results of LFO in polystyrene, in solution and in polynorbornene

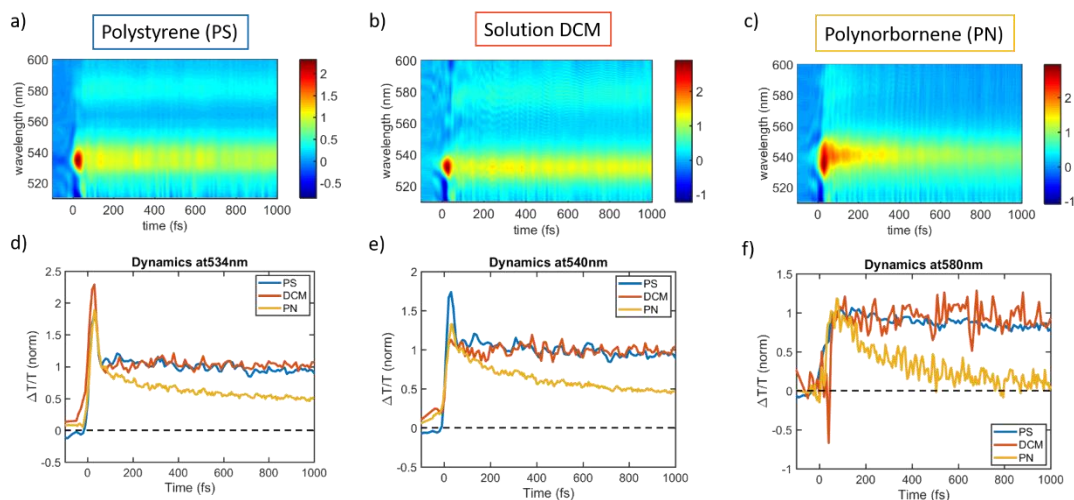

**Figure S2.** Transient absorption maps, as a function of wavelength and delay, of LFO in polystyrene (a), in solution (b) and in polynorbornene (c). Time traces comparison at  $\lambda=534$  nm (d),  $\lambda=540$  nm (e) and  $\lambda=580$  nm (f).

## 3. 2DES of LFO diluted in DCM

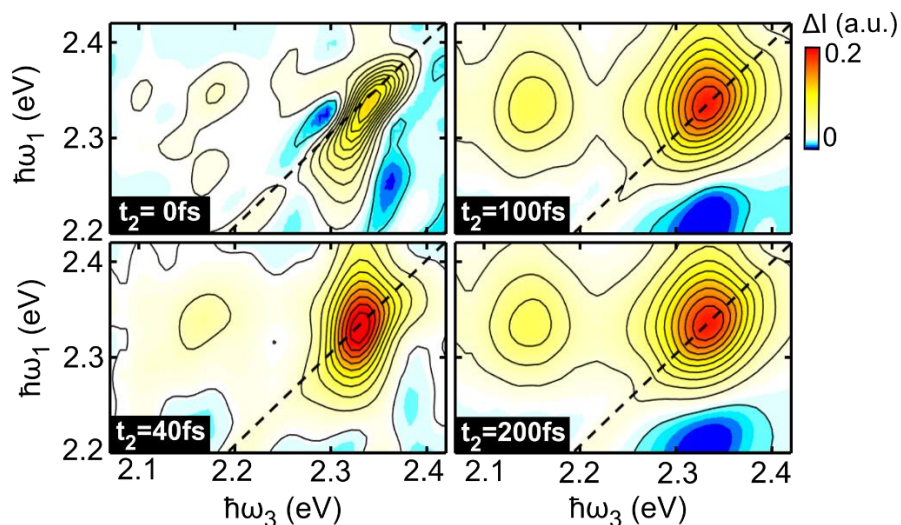

**Figure S3.** Purely absorptive 2DES maps of LFO 10% concentrated diluted in DCM at room temperature and at following population times:  $t_2=0$ fs, 40fs, 100fs and 200fs; the diagonal line is emphasized with a dashed black line.

#### 4. Lineshape analysis results of LFO in Polystyrene obtained with inhomogeneous limit approach

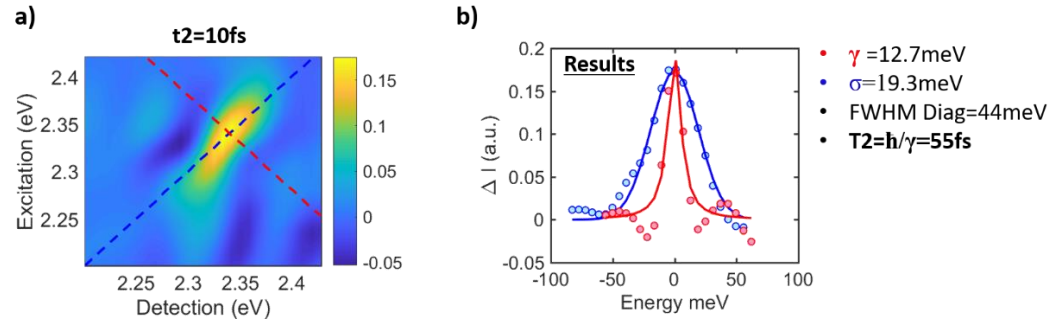

**Figure S4.** a) Purely absorptive zoomed 2DES map at  $t_2=10\text{fs}$  and  $T=295\text{K}$  of LFO in polystyrene in which the diagonal and anti-diagonal cuts are emphasized with blue and red dashed lines respectively; b) Diagonal (blue) and anti-diagonal (red) experimental points overlapped with the best fit obtained by using the inhomogeneous limit model. The results are reported on the right side of the plots ( $\gamma=12.7\text{meV}$  and  $\sigma=19.3\text{meV}$ ).

#### 5. Lineshape analysis results of LFO diluted in DCM

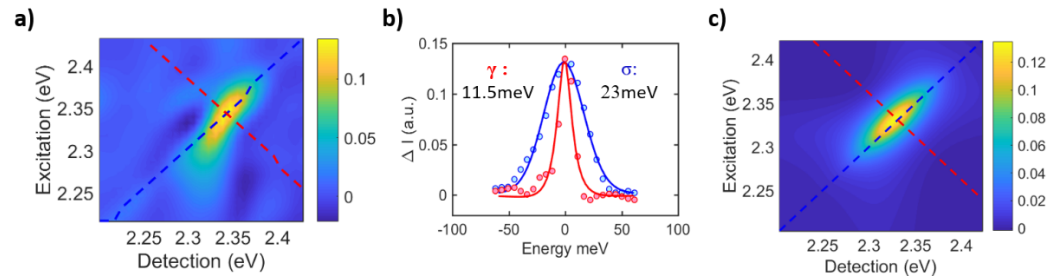

**Figure S5.** a) Purely absorptive zoomed 2DES map of LFO diluted in DCM (10% concentrated) at  $t_2=0\text{fs}$  and  $T=295\text{K}$ ; b) Experimental (dots) and best fit (solid lines) of the diagonal (blue) and anti-diagonal (red) cuts obtained by using Eq 1 in which the final values of  $\gamma$  and  $\sigma$  are reported on the graph; c) Simulated 2DES map obtained by substituting the best fit parameters in Eq. 1.

#### 6. Transient absorption frequency analysis results for LFO/PS

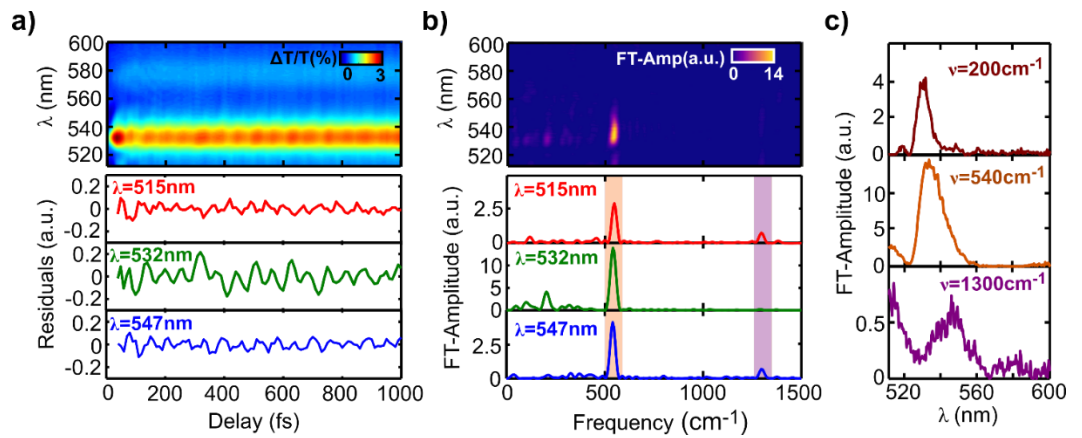

**Figure S6.** frequency analysis of the oscillatory component of the signal for LFO in polystyrene: panel a) transient absorption 2D map (on top) and time traces obtained by subtracting the exponential decay part at  $\lambda=515\text{nm}$  (red),  $\lambda=532\text{nm}$  (green) and  $\lambda=547\text{nm}$  (blue). Panel b) 2D Frequency map obtained by Fourier transforming the transient absorption data (on top) and horizontal cuts at

$\lambda=515\text{nm}$  (red),  $\lambda=532\text{nm}$  (green) and  $\lambda=547\text{nm}$  (blue). Panel c) vertical cuts of the 2D frequency map in panel b) at  $\nu=200\text{cm}^{-1}$  (dark red),  $\nu=540\text{cm}^{-1}$  (orange) and  $\nu=1300\text{cm}^{-1}$  (violet).

### 7. CLS dynamics of LFO in polystyrene and diluted in DCM

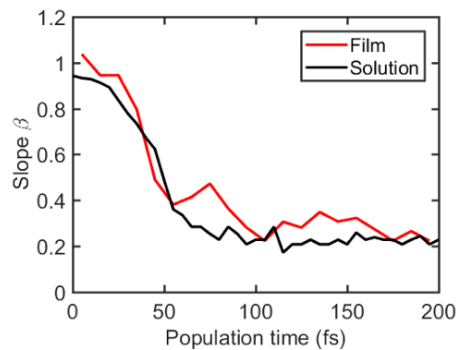

**Figure S7.** Comparison of CLS dynamics for LFO in polystyrene (red) and LFO diluted in DCM (black) at room temperature.

### 8. Lineshape best fit residuals

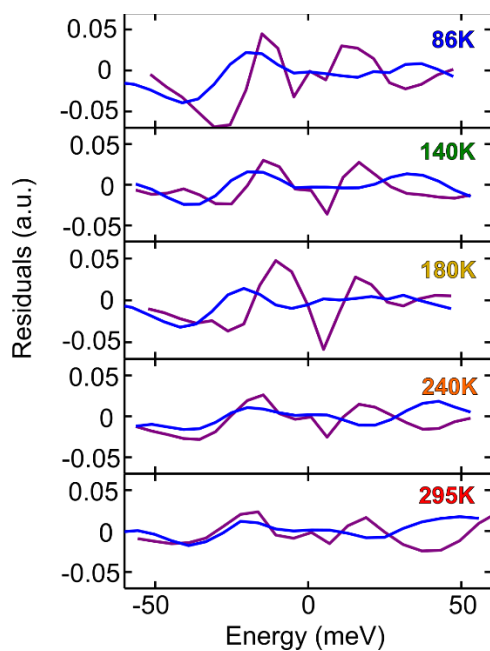

**Figure S8.** Diagonal (blue) and anti-diagonal (violet) best fit residuals obtained by using Eq. 1 at different temperature; starting from the top we have 86K, 140K, 180K, 240K and 295K.

### 9. CLS best fit residuals

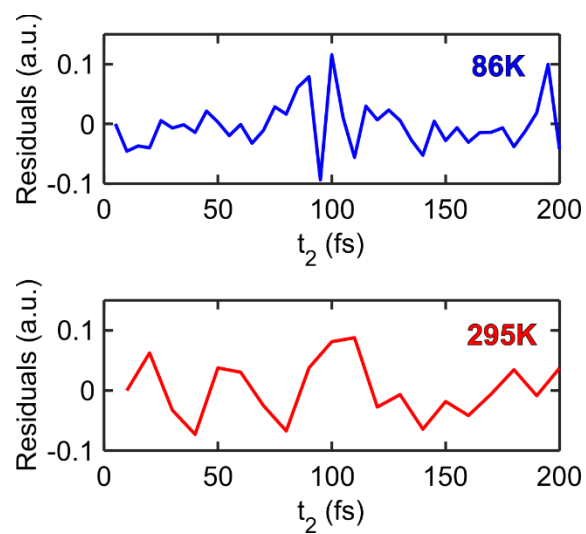

**Figure S9.** CLS best fit residuals obtained at 86K (top, blue) and 295K (red, bottom) by using Eq. 3
